# Supplementary material
Source: Springer Nature journal article supplement (https://www.springermedizin.de/resource/supplementary/12885_2010_2598_MOESM1_ESM.pdf/9461540)

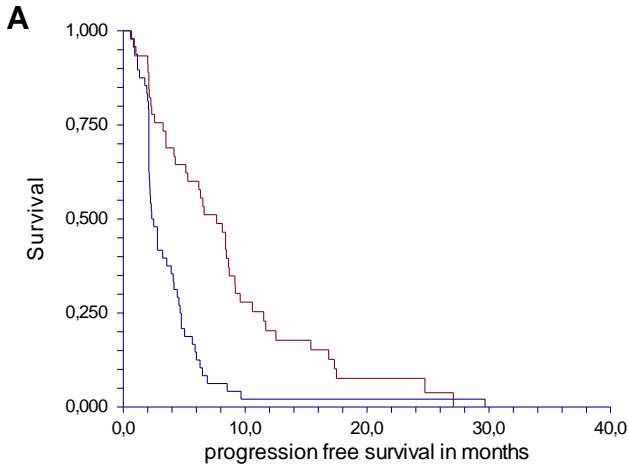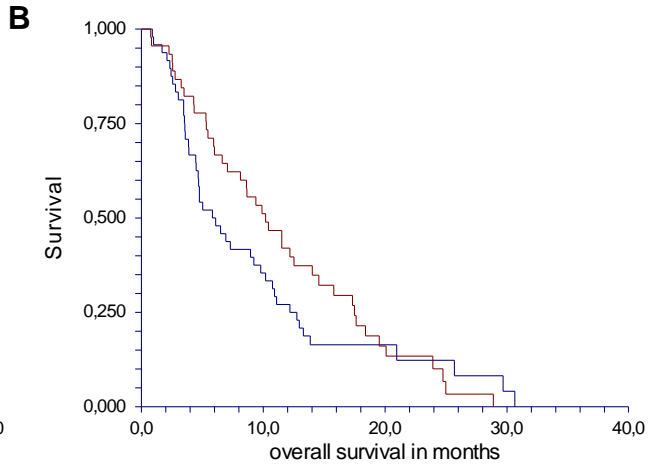

Supplement: MOESM1 [file 9461540]
